# Supplementary material for: Rational design of a novel quaternary ZnO@ZnS/Ag@Ag2S nanojunction system for enhanced photocatalytic H2 production
Source: Royal Society of Chemistry journal article supplement (doi:10.1039/c8qi00828k), 2018-01-01
Supplement: c8qi00828k1.pdf [file c8qi00828k1.pdf]

**Supporting information for**  
**Rational Design of a Novel Quaternary ZnO@ZnS/Ag@Ag<sub>2</sub>S**  
**Nanojunction System for Enhanced Photocatalytic H<sub>2</sub> Production**

Yiping Su<sup>†a</sup>, Zhicheng Zhao<sup>†a</sup>, Shun Li,<sup>\*a,b</sup> Fei Liu<sup>a</sup> and Zuotai Zhang<sup>\*a</sup>

<sup>a</sup> *School of Environmental Science and Engineering, Guangdong Provincial Key Laboratory of Soil and Groundwater Pollution Control, Southern University of Science and Technology, Shenzhen 518055, China*

<sup>b</sup> *SUSTech Academy for Advanced Interdisciplinary Studies, Southern University of Science and Technology, Shenzhen 518055, China*

\*Corresponding author: Emails: lis3@sustc.edu.cn; zhangzt@sustc.edu.cn

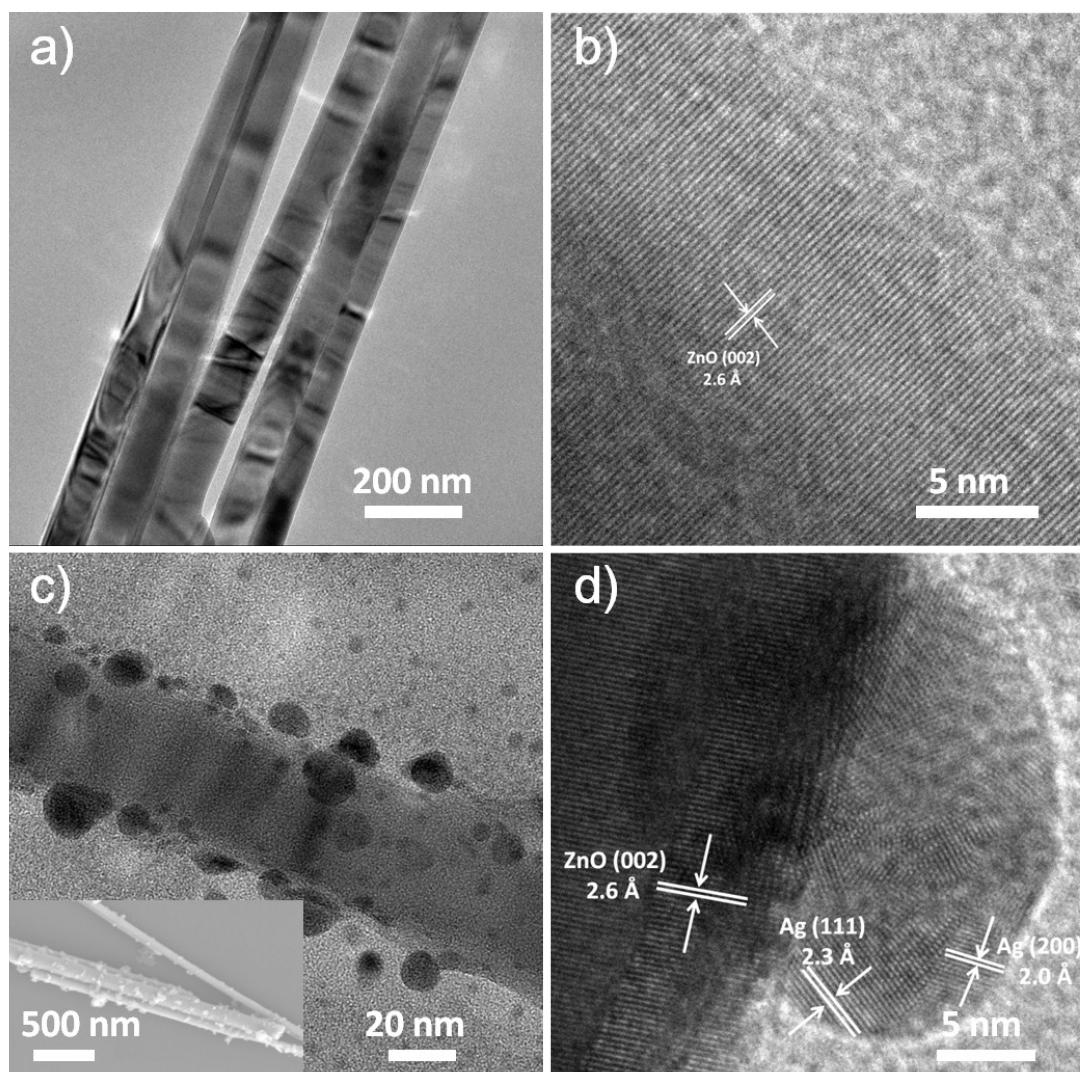

**Figure S1.** (a) TEM and (b) HRTEM images of ZnO nanowires. (c) TEM and (d) HRTEM images of ZnO/Ag.

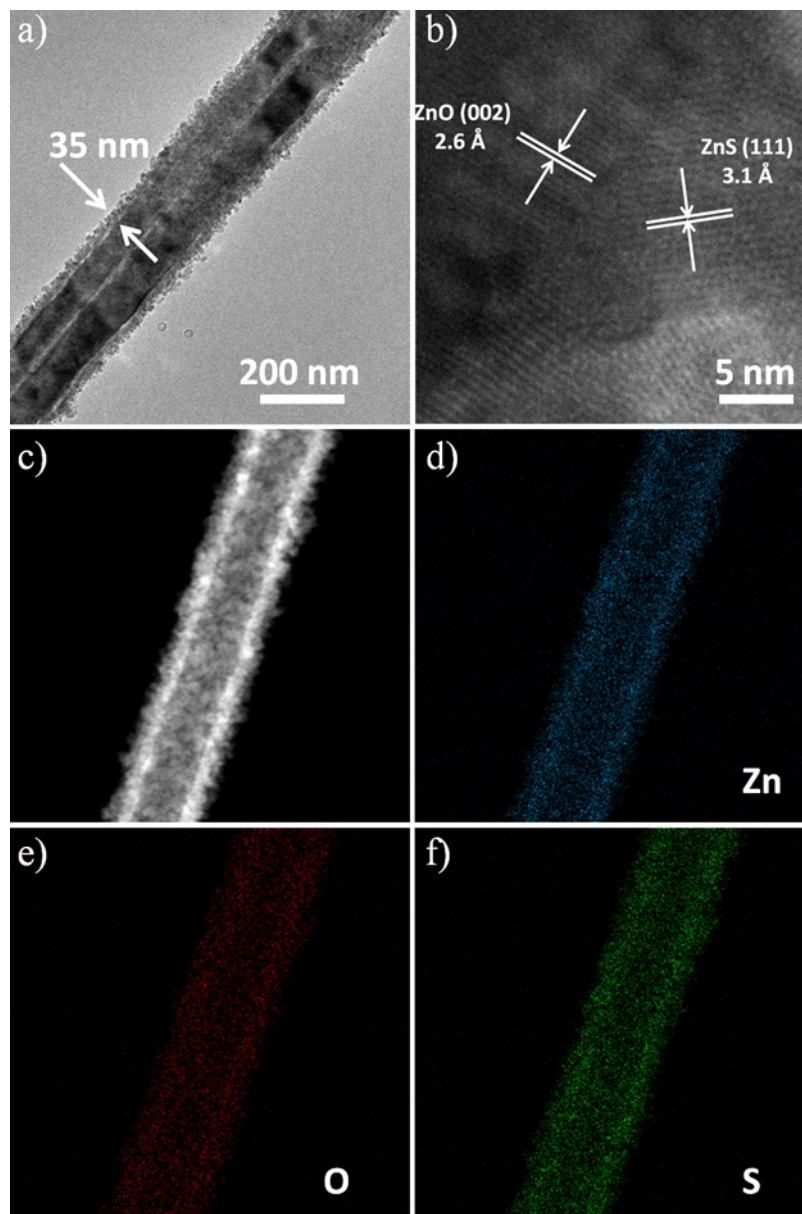

**Figure S2.** (a) TEM, (b) HRTEM, (c) HAADF-STEM, and the element mapping images of (d) Zn, (e) O and (f) S of ZnO/ZnS.
